# Supplementary material for: Clinical Features, Pathological Features, and Treatment Outcomes of 22 Patients with Aggressive Adult T-cell Leukemia-lymphoma Treated with a Humanized CCR4 Antibody (Mogamulizumab) at a Single Institution during a 6-year Period (2012-2018)
Source: PubMed Central journal article supplement — Intern Med. 2019 Apr 17;58(15):2159–66. doi: 10.2169/internalmedicine.2513-18 (PMC6709313; doi:10.2169/internalmedicine.2513-18), 2019-04-17
Supplement: 1349-7235-58-2159-s001.pdf [file 1349-7235-58-2159-s001.pdf]

**Supplemental Table1: Summary of clinical and pathological findings in analyzed cases.**

| Case No. | Age | Gender | Subtype  | sATL-PI      | Response to prior treatments | Response to mogamulizumab (4 cycles) | Best overall response to mogamulizumab | ATL cases treated with mogamulizumab who were consolidated with allo-HSCT | Outcome                   | Survival time from mogamulizumab administration | CCR4     | CCR4 global score | CD3      | CD4      | CD8      | TIL (%) | nPDL1    | mPDL1    | Foxp3    | HLA class I | HLA class II | CCR4 status |           |           |
|----------|-----|--------|----------|--------------|------------------------------|--------------------------------------|----------------------------------------|---------------------------------------------------------------------------|---------------------------|-------------------------------------------------|----------|-------------------|----------|----------|----------|---------|----------|----------|----------|-------------|--------------|-------------|-----------|-----------|
| 1        | 70  | Female | Acute    | High         | PD                           | CR                                   | CR                                     | -                                                                         | Death                     | 66                                              | NA       | NA                | NA       | NA       | NA       | NA      | NA       | NA       | NA       | NA          | NA           | NA          | NA        |           |
| 2        | 48  | Female | Acute    | High         | PD                           | PR                                   | PR                                     | -                                                                         | Death                     | 36                                              | NA       | NA                | NA       | NA       | NA       | NA      | NA       | NA       | NA       | NA          | NA           | NA          | NA        |           |
| 3        | 74  | Female | Acute    | High         | PD                           | CR                                   | CR                                     | -                                                                         | Death                     | 360                                             | Positive | 4                 | Positive | Positive | Negative | 2       | Positive | Negative | Positive | Positive    | Negative     | Negative    | wild type |           |
| 4        | 61  | Female | Acute    | Intermediate | PD                           | PD                                   | PD                                     | -                                                                         | Death                     | 41                                              | Positive | 1                 | Positive | Positive | Negative | 3       | Negative | Positive | Positive | Negative    | Negative     | Negative    | wild type |           |
| 5        | 80  | Male   | Lymphoma | Intermediate | PD                           | PD                                   | PD                                     | -                                                                         | Death                     | 49                                              | NA       | NA                | NA       | NA       | NA       | NA      | NA       | NA       | NA       | NA          | NA           | NA          | NA        |           |
| 6        | 79  | Male   | Lymphoma | High         | PD                           | PD                                   | PD                                     | -                                                                         | Death                     | 55                                              | Positive | 4                 | Positive | -        | Negative | 0.5     | Negative | Positive | Positive | Negative    | Negative     | Negative    | Mutated   |           |
| 7        | 67  | Female | Acute    | Intermediate | PD                           | PR                                   | PR                                     | -                                                                         | Death                     | 46                                              | NA       | NA                | NA       | NA       | NA       | NA      | NA       | NA       | NA       | NA          | NA           | NA          | NA        |           |
| 8        | 72  | Male   | Lymphoma | Intermediate | PD                           | CR                                   | CR                                     | -                                                                         | Death                     | 459                                             | Positive | 12                | Positive | Positive | Negative | 0.5     | Negative | Positive | Negative | Positive    | Positive     | Positive    | wild type |           |
| 9        | 63  | Female | Lymphoma | High         | PD                           | SD                                   | SD                                     | +                                                                         | Death                     | 336                                             | Positive | 2                 | Positive | Positive | Negative | 5       | Negative | Negative | Negative | Positive    | Negative     | Negative    | Mutated   |           |
| 10       | 55  | Male   | Acute    | Intermediate | PD                           | SD                                   | SD                                     | -                                                                         | Death                     | 272                                             | Positive | 12                | Positive | Positive | Negative | 10      | Negative | Negative | Negative | Positive    | Positive     | Positive    | Mutated   |           |
| 11       | 63  | Female | Acute    | Intermediate | PD                           | PR                                   | PR                                     | -                                                                         | Death                     | 129                                             | NA       | NA                | NA       | NA       | NA       | NA      | NA       | NA       | NA       | NA          | NA           | NA          | NA        |           |
| 12       | 51  | Male   | Acute    | Intermediate | PR                           | CR                                   | CR                                     | -                                                                         | Death                     | 82                                              | NA       | NA                | NA       | NA       | NA       | NA      | NA       | NA       | NA       | NA          | NA           | NA          | NA        |           |
| 13       | 46  | Female | Acute    | High         | PR                           | CR                                   | CR                                     | +                                                                         | Survival without lymphoma | 1360                                            | NA       | NA                | NA       | NA       | NA       | NA      | NA       | NA       | NA       | NA          | NA           | NA          | NA        |           |
| 14       | 54  | Male   | Acute    | Intermediate | PR                           | CR                                   | CR                                     | +                                                                         | Survival without lymphoma | 1647                                            | Negative | 1                 | Negative | Negative | Negative | 0       | Negative | Negative | Negative | Negative    | Negative     | Negative    | Negative  | wild type |
| 15       | 63  | Male   | Acute    | Intermediate | PD                           | CR                                   | CR                                     | -                                                                         | Death                     | 653                                             | Positive | 6                 | Positive | Positive | Negative | 2       | Negative | Positive | Positive | Positive    | Positive     | Negative    | Mutated   |           |
| 16       | 79  | Female | Lymphoma | High         | PD                           | PR                                   | PR                                     | -                                                                         | Death                     | 170                                             | Positive | 8                 | Positive | Positive | Positive | 0       | Negative | Negative | Negative | Positive    | Positive     | Positive    | Mutated   |           |
| 17       | 57  | Female | Lymphoma | Intermediate | PD                           | PR                                   | PR                                     | -                                                                         | Death                     | 101                                             | Positive | 12                | Positive | Negative | Positive | 0.5     | Negative | Positive | Negative | Negative    | Negative     | Negative    | wild type |           |
| 18       | 71  | Female | Acute    | High         | PD                           | PR                                   | PR                                     | -                                                                         | Death                     | 100                                             | Positive | 12                | Positive | Positive | Negative | 0.2     | Negative | Negative | Positive | Positive    | Positive     | Negative    | wild type |           |
| 19       | 53  | Female | Acute    | Intermediate | PD                           | PD                                   | PD                                     | -                                                                         | NA                        | NA                                              | Positive | 6                 | Positive | Positive | Negative | 20      | Positive | Negative | Negative | Positive    | Positive     | Positive    | wild type |           |
| 20       | 69  | Female | Acute    | Intermediate | PD                           | CR                                   | CR                                     | -                                                                         | Survival without lymphoma | 494                                             | NA       | NA                | NA       | NA       | NA       | NA      | NA       | NA       | NA       | NA          | NA           | NA          | NA        |           |
| 21       | 78  | Female | Acute    | Intermediate | PD                           | PD                                   | PD                                     | -                                                                         | Death                     | 91                                              | Negative | 0                 | Positive | Positive | Negative | 0       | Negative | Positive | Negative | Positive    | Positive     | Positive    | Mutated   |           |
| 22       | 69  | Male   | Acute    | High         | PD                           | PR                                   | PR                                     | -                                                                         | Survival without lymphoma | 34                                              | Positive | 12                | Positive | Positive | Negative | 10      | Negative | Positive | Negative | Positive    | Positive     | Positive    | wild type |           |

NA, not available; CR, complete remission; PR, partial remission; SD, stable disease; PD progressive disease; TIL, tumor-infiltrating lymphocyte; sATL-PI, simplified Adult T-cell leukemia/lymphoma prognostic index; nPDL1, PDL1 expression in neoplastic cells; mPDL1, PDL1 expression in microenvironment.
