# Supplementary material for: Clinical Features, Pathological Features, and Treatment Outcomes of 22 Patients with Aggressive Adult T-cell Leukemia-lymphoma Treated with a Humanized CCR4 Antibody (Mogamulizumab) at a Single Institution during a 6-year Period (2012-2018)
Source: PubMed Central journal article supplement — Intern Med. 2019 Apr 17;58(15):2159–66. doi: 10.2169/internalmedicine.2513-18 (PMC6709313; doi:10.2169/internalmedicine.2513-18), 2019-04-17
Supplement: 1349-7235-58-2159-s002.pdf [file 1349-7235-58-2159-s002.pdf]

Supplemental Table 2. *CCR4* mutations identified in the current study

| <b>Sample ID</b> | <b>Subtype</b> | <b>Amino acid change</b> | <b>Estimated variant allele frequency</b> |
|------------------|----------------|--------------------------|-------------------------------------------|
| Case 6           | Lymphoma       | p.Y331*                  | 0.1-0.2                                   |
| Case 6           | Lymphoma       | p.Q336*                  | 0.5                                       |
| Case 9           | Lymphoma       | p.Y331*                  | 0.1-0.2                                   |
| Case 10          | Acute          | p.S344fs                 | 0.4                                       |
| Case 15          | Acute          | p.Y331fs                 | 0.1-0.2                                   |
| Case 16          | Lymphoma       | p.Q330*                  | 0.5                                       |
| Case 21          | Acute          | p.Q336*                  | 0.5                                       |
